# Supplementary material for: Non-Heading Chinese Cabbage Database: An Open-Access Platform for the Genomics of Brassica campestris (syn. Brassica rapa) ssp. chinensis
Source: MDPI journal article supplement (doi:10.3390/plants11081005), 2022-04-07
Supplement: s1 [file s1]

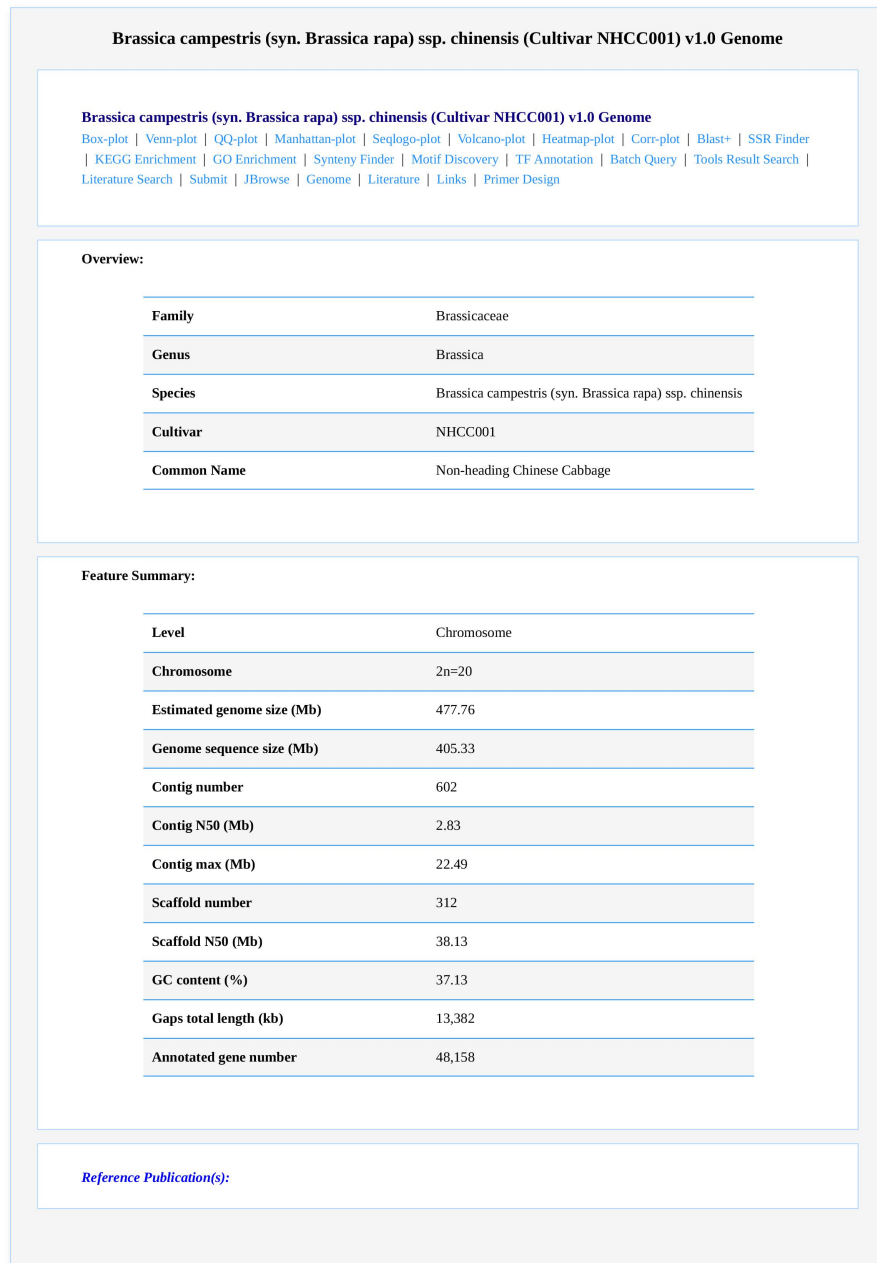

**Figure S1.** Screenshots of a genomic data page for *Brassica campestris* (syn. *Brassica rapa*) ssp. *chinensis* NHCC001 v1.0 Genome.
